# Supplementary material
Source: Springer Nature journal article supplement (https://www.springermedizin.de/resource/supplementary/12967_2011_848_MOESM3_ESM.pdf/9577186)

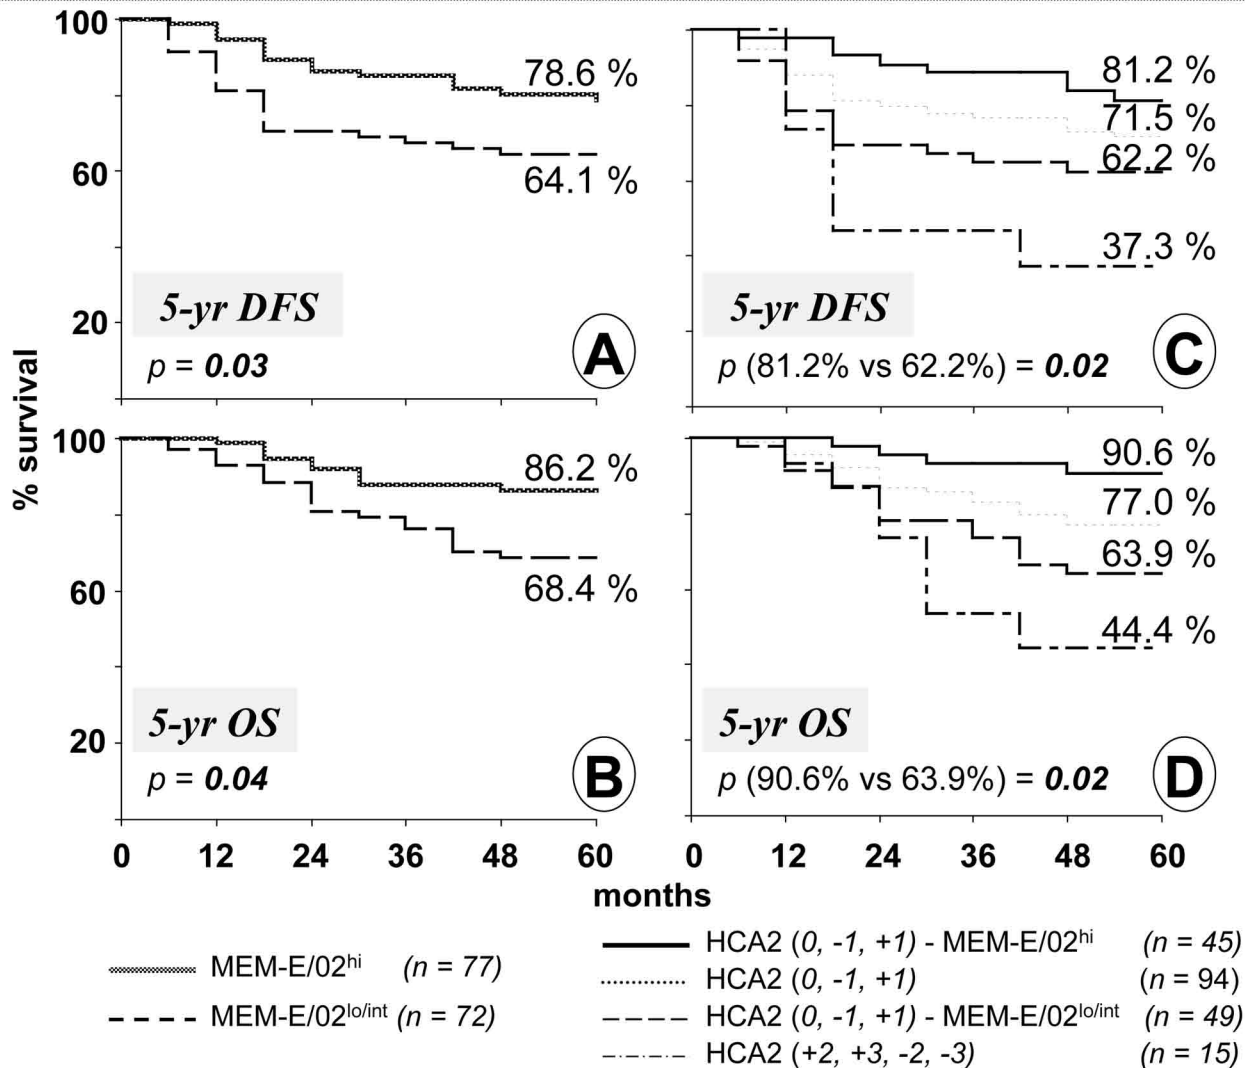

Supplement: MOESM3 [file 9577186]
